# Supplementary material for: Land-atmosphere interactions in sub-polar and alpine climates in the CORDEX FPS LUCAS models: I. Evaluation of the snow-albedo effect
Source: Copernicus journal article supplement (doi:10.5194/tc-2021-290), 2021-10-18
Supplement: Supplementary file 1 [file tc-2021-290-supplement.pdf]

# 1 Supplemental Material

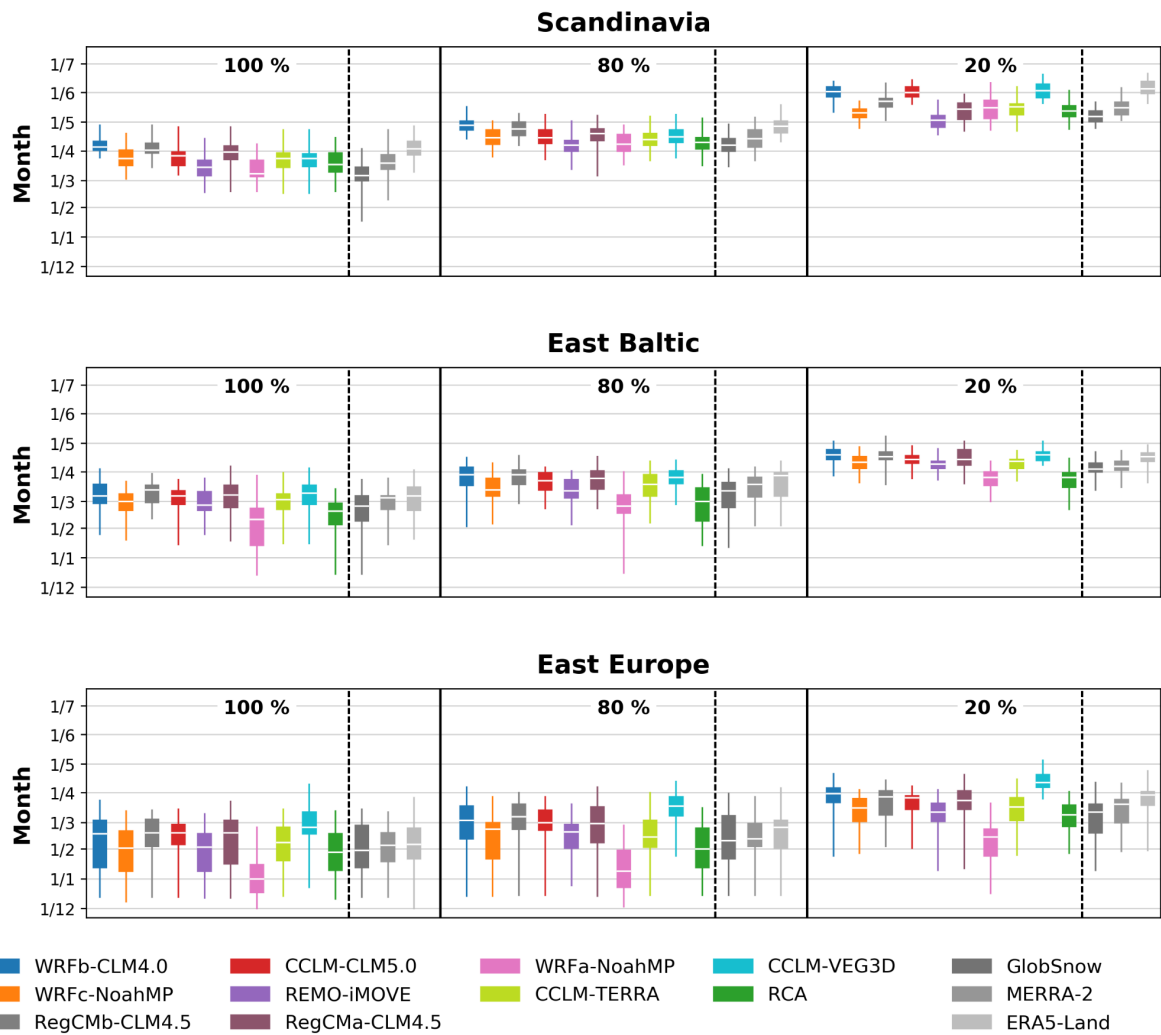

2

3 **Figure S1:** Timing of maximum snow mass (100%) and timing of reduction to 80% and 20% snow  
 4 mass for Scandinavia, East Baltic, and East Europe for RCMs, the satellite product GlobSnow (v3.0; ),  
 5 MERRA-2, and ERA5-Land. The box-and-whisker plots indicate the interannual variability for the 29  
 6 winters between 1986/87 to 2014/15; white lines represent the median, boxes the interquartile range,  
 7 and whiskers the minimum and maximum values. Note that the 20% snow mass estimates in Scandinavia  
 8 for GlobSnow only contain 27 years since GlobSnow did not reach 20% snow mass in 1996 and 1997  
 9 as it does not provide data during summer months.
